# Supplementary figures and images for: Diagnostic accuracy of 22/25-gauge core needle in endoscopic ultrasound-guided sampling: systematic review and meta-analysis
Source: PubMed Central journal article supplement — Korean J Intern Med. 2016 Sep 2;31(6):1073–83. doi: 10.3904/kjim.2016.066 (PMC5094933; doi:10.3904/kjim.2016.066), 2016-09-02

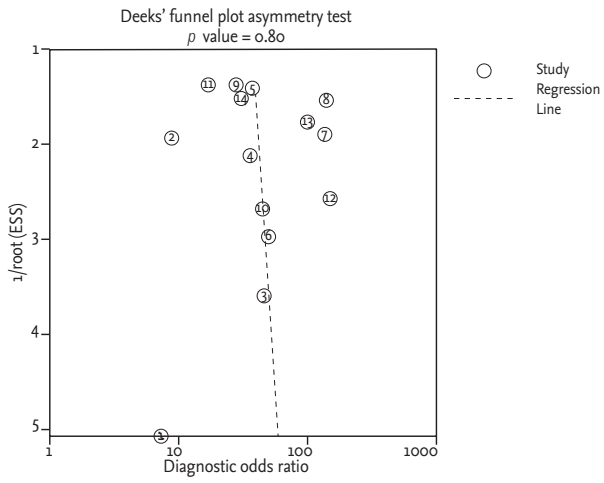

**Appendix 2.** Publication bias. ESS, effective sample size.

Supplement: kjim-2016-066-app2.pdf [file kjim-2016-066-app2.pdf]
